# Supplementary material for: Influence of bridging and chelating co-ligands on the distinct single-molecule magnetic behaviours in ZnDy complexes
Source: Royal Society of Chemistry journal article supplement (doi:10.1039/d2nj03793a), 2022-01-01
Supplement: d2nj03793a1.pdf [file d2nj03793a1.pdf]

## Supplementary Information

### **Influence of bridging and chelating co-ligands on the distinct slow magnetic relaxation behaviours in ZnDy complexes**

Anangamohan Panja\*<sup>a,b</sup> Zvonko Jagličić,<sup>c</sup> Radovan Herchel,<sup>d</sup> Paula Brandão,<sup>e</sup>  
and Narayan Ch. Jana,<sup>a</sup>

<sup>a</sup> *Department of Chemistry, Panskura Banamali College, Panskura RS, WB 721152, India*

<sup>b</sup> *Department of Chemistry, Gokhale Memorial Girls' College, 1/1 Harish Mukherjee Road, Kolkata-700020, India.*

<sup>c</sup> *Institute of Mathematics, Physics and Mechanics & Faculty of Civil and Geodetic Engineering, University of Ljubljana, Jadranska 19, 1000 Ljubljana, Slovenia*

<sup>d</sup> *Department of Inorganic Chemistry, Faculty of Science, Palacký University, 17. listopadu 12, 77146 Olomouc, Czech Republic*

<sup>e</sup> *Department of Chemistry, CICECO-Aveiro Institute of Materials, University of Aveiro, 3810-193 Aveiro, Portugal*

\* Corresponding author e-mail: [ampanja@yahoo.co.in](mailto:ampanja@yahoo.co.in)

## Table of Contents

|                                                                                                                                                                                                     |    |
|-----------------------------------------------------------------------------------------------------------------------------------------------------------------------------------------------------|----|
| <b>Table S1.</b> Crystallographic data and structure refinement parameters of <b>1-4</b> .....                                                                                                      | 4  |
| <b>Table S2.</b> SHAPE analysis of the Dy(III) ion for complex <b>1</b> .....                                                                                                                       | 5  |
| <b>Table S3.</b> SHAPE analysis of the Dy(III) ion for complexes <b>2, 3</b> and <b>4</b> .....                                                                                                     | 5  |
| <b>Table S4.</b> Relaxation fitting parameters from the least-square fitting of the Cole-Cole plots of <b>1</b> by the single-component generalized Debye model at zero and 1000 Oe dc fields. .... | 6  |
| <b>Table S5.</b> Relaxation fitting parameters from the least-square fitting of the Cole-Cole plots of <b>2</b> by the single-component generalized Debye model at zero and 1000 Oe dc fields. .... | 7  |
| <b>Table S6.</b> Relaxation fitting parameters from the least-square fitting of the Cole-Cole plots of <b>4</b> by the single-component generalized Debye model at zero dc field. ....              | 9  |
| <b>Table S7.</b> Relaxation fitting parameters from the least-square fitting of the Cole-Cole plots of <b>4</b> by the double-component generalized Debye model at 1000 Oe dc field.....            | 10 |
| <b>Table S8.</b> Relaxation fitting parameters from the least-square fitting of the Cole-Cole plots of <b>3</b> by the single-component generalized Debye model at 600 Oe dc field.....             | 11 |
| <b>Table S9.</b> Relaxation fitting parameters from the least-square fitting of the Cole-Cole plots of <b>3</b> by the single-component generalized Debye model at 2000 Oe dc field.....            | 11 |
| <b>Table S10.</b> The splitting of ${}^6\text{H}_{15/2}$ the lowest multiplets for <b>1</b> calculated by CASSCF/SINGLE_ANISO together with $g$ -values for each Kramers doublets.....              | 12 |
| <b>Table S11.</b> The splitting of ${}^6\text{H}_{15/2}$ the lowest multiplets for <b>2</b> calculated by CASSCF/SINGLE_ANISO together with $g$ -values for each Kramers doublets.....              | 12 |
| <b>Table S12.</b> The splitting of ${}^6\text{H}_{15/2}$ the lowest multiplets for <b>3</b> calculated by CASSCF/SINGLE_ANISO together with $g$ -values for each Kramers doublets.....              | 12 |
| <b>Table S13.</b> The splitting of ${}^6\text{H}_{15/2}$ the lowest multiplets for <b>4-A</b> calculated by CASSCF/SINGLE_ANISO together with $g$ -values for each Kramers doublets.....            | 13 |
| <b>Table S14.</b> The splitting of ${}^6\text{H}_{15/2}$ the lowest multiplets for <b>4-B</b> calculated by CASSCF/SINGLE_ANISO together with $g$ -values for each Kramers doublets.....            | 13 |
| <b>Fig. S1.</b> IR spectra of <b>1-4</b> .....                                                                                                                                                      | 13 |
| <b>Fig. S2.</b> Experimental and simulated PXRD patterns of <b>1-4</b> .....                                                                                                                        | 14 |
| <b>Fig. S3.</b> A part of crystal packing for <b>1</b> .....                                                                                                                                        | 15 |
| <b>Fig. S4.</b> A part of crystal packing showing hydrogen bonding interaction (top) and $\pi\cdots\pi$ stacking interaction (bottom) for <b>2</b> .....                                            | 15 |
| <b>Fig. S5.</b> A part of crystal packing for <b>3</b> .....                                                                                                                                        | 16 |
| <b>Fig. S6.</b> A part of crystal packing for <b>4</b> .....                                                                                                                                        | 16 |
| <b>Fig. S8.</b> Out-of-phase ac susceptibility as a function of dc magnetic field (left) and frequency (right) for <b>1</b> measured at 2 K.....                                                    | 17 |
| <b>Fig. S9.</b> Out-of-phase ac susceptibility as a function of dc magnetic field (left) and frequency (right) for <b>2</b> measured at 2 K.....                                                    | 17 |

|                                                                                                                                                                                                                                                             |    |
|-------------------------------------------------------------------------------------------------------------------------------------------------------------------------------------------------------------------------------------------------------------|----|
| <b>Fig. S10.</b> Out-of-phase ac susceptibility as a function of dc magnetic field (left) and frequency (right) for <b>3</b> measured at 2 K. ....                                                                                                          | 18 |
| <b>Fig. S11.</b> Out-of-phase ac susceptibility as a function of dc magnetic field (left) and frequency (right) for <b>4</b> measured at 2 K. The magnetic data are scaled per one Dy <sup>III</sup> ion. ....                                              | 18 |
| <b>Fig. S12.</b> The variable temperature out-of-phase ac susceptibility data of <b>-3</b> at zero dc field. ....                                                                                                                                           | 19 |
| <b>Fig. S13.</b> Frequency dependence of the out-of-phase ac susceptibility component of <b>1</b> , <b>2</b> and <b>4</b> measured in the temperature range 1.9–10 K and at zero dc field. The magnetic data are scaled per one Dy <sup>III</sup> ion. .... | 19 |
| <b>Fig. S15.</b> Frequency dependence of the out-of-phase ac susceptibility component of <b>1</b> and <b>2</b> measured in the temperature range 1.9–10 K and at 1000 Oe dc field. Solid lines represent the best fit by the generalised Debye model. ....  | 20 |
| <b>Fig. S18.</b> Temperature dependence of in-phase (a) and out-of-phase (b) ac susceptibilities and Cole-Cole plots fitted by three-set Debye model (c) for <b>3</b> at 2000 Oe dc field. ....                                                             | 21 |
| <b>Fig. S19.</b> Plots made by SINGLE_ANISO module based on CASSCF calculations for Dy <sup>III</sup> complexes of <b>1-4</b> . The red lines represent the transition matrix elements of the magnetic moment connecting two states. ....                   | 22 |
| <b>Fig. S20.</b> The molecular structures of <b>1-4</b> derived from the experimental X-ray geometry used for CASSCF calculations overlaid with of g-tensor of the first Kramers doublet (x/y/z-axis are showed as red/green/blue arrows). ....             | 23 |

**Table S1.** Crystallographic data and structure refinement parameters of **1–4**.

|                                                               | <b>1</b>                                                                            | <b>2</b>                                                                      | <b>3</b>                                                                     | <b>4</b>                                                                                          |
|---------------------------------------------------------------|-------------------------------------------------------------------------------------|-------------------------------------------------------------------------------|------------------------------------------------------------------------------|---------------------------------------------------------------------------------------------------|
| Empirical formula                                             | C <sub>30</sub> H <sub>27</sub> N <sub>6</sub> O <sub>13</sub> Cl <sub>2</sub> ZnDy | C <sub>30</sub> H <sub>37</sub> N <sub>2</sub> O <sub>13</sub> ZnDy           | C <sub>28</sub> H <sub>28</sub> N <sub>3</sub> O <sub>11</sub> ZnDy          | C <sub>75</sub> H <sub>95</sub> N <sub>4</sub> O <sub>21.50</sub> Zn <sub>2</sub> Dy <sub>2</sub> |
| Formula weight                                                | 978.34                                                                              | 861.48                                                                        | 810.40                                                                       | 1852.28                                                                                           |
| Temperature/K                                                 | 150(2)                                                                              | 150(2)                                                                        | 150(2)                                                                       | 150(2)                                                                                            |
| Crystal system                                                | monoclinic                                                                          | monoclinic                                                                    | monoclinic                                                                   | monoclinic                                                                                        |
| Space group                                                   | P2 <sub>1</sub> /n                                                                  | C2/c                                                                          | P2 <sub>1</sub> /c                                                           | P2 <sub>1</sub> /c                                                                                |
| <i>a</i> /Å                                                   | 12.5542(7)                                                                          | 22.205(2)                                                                     | 13.183(4)                                                                    | 15.6478(12)                                                                                       |
| <i>b</i> /Å                                                   | 18.0783(10)                                                                         | 10.8751(11)                                                                   | 14.076(4)                                                                    | 22.9141(16)                                                                                       |
| <i>c</i> /Å                                                   | 15.5861(9)                                                                          | 27.261(3)                                                                     | 15.695(6)                                                                    | 22.4930(18)                                                                                       |
| <i>α</i> /°                                                   | 90                                                                                  | 90                                                                            | 90                                                                           | 90                                                                                                |
| <i>β</i> /°                                                   | 97.757(2)                                                                           | 91.454(4)                                                                     | 95.718(14)                                                                   | 101.537(3)                                                                                        |
| <i>γ</i> /°                                                   | 90                                                                                  | 90                                                                            | 90                                                                           | 90                                                                                                |
| Volume/Å <sup>3</sup>                                         | 3505.0(3)                                                                           | 6580.8(11)                                                                    | 2898.0(16)                                                                   | 7902.0(10)                                                                                        |
| <i>Z</i>                                                      | 4                                                                                   | 8                                                                             | 4                                                                            | 4                                                                                                 |
| $\rho_{\text{calc}}$ g/cm <sup>3</sup>                        | 1.854                                                                               | 1.739                                                                         | 1.857                                                                        | 1.557                                                                                             |
| $\mu$ /mm <sup>-1</sup>                                       | 3.026                                                                               | 3.050                                                                         | 3.453                                                                        | 2.542                                                                                             |
| <i>F</i> (000)                                                | 1932                                                                                | 3448                                                                          | 1604                                                                         | 3748                                                                                              |
| 2 $\theta$ range for data collection/°                        | 5.008 to 58.39                                                                      | 6.09 to 61.044                                                                | 4.818 to 61.342                                                              | 4.966 to 54.482                                                                                   |
| Reflections collected                                         | 80102                                                                               | 91442                                                                         | 78459                                                                        | 154491                                                                                            |
| Independent reflections                                       | 9476 [ <i>R</i> <sub>int</sub> = 0.0235, <i>R</i> <sub>sigma</sub> = 0.0122]        | 10022 [ <i>R</i> <sub>int</sub> = 0.0269, <i>R</i> <sub>sigma</sub> = 0.0137] | 8940 [ <i>R</i> <sub>int</sub> = 0.0457, <i>R</i> <sub>sigma</sub> = 0.0224] | 17535 [ <i>R</i> <sub>int</sub> = 0.0627, <i>R</i> <sub>sigma</sub> = 0.0328]                     |
| Data/restraints/parameter                                     | 9476/0/492                                                                          | 10022 /2/444                                                                  | 8940 /0/403                                                                  | 17535 /0/986                                                                                      |
| Goodness-of-fit on <i>F</i> <sup>2</sup>                      | 1.141                                                                               | 1.083                                                                         | 1.091                                                                        | 1.101                                                                                             |
| Final <i>R</i> indexes [ <i>I</i> >= 2 $\sigma$ ( <i>I</i> )] | <i>R</i> <sub>1</sub> = 0.0279,<br><i>wR</i> <sub>2</sub> = 0.0617                  | <i>R</i> <sub>1</sub> = 0.0163,<br><i>wR</i> <sub>2</sub> = 0.0393            | <i>R</i> <sub>1</sub> = 0.0212,<br><i>wR</i> <sub>2</sub> = 0.0483           | <i>R</i> <sub>1</sub> = 0.0769,<br><i>wR</i> <sub>2</sub> = 0.1739                                |
| Final <i>R</i> indexes [all data]                             | <i>R</i> <sub>1</sub> = 0.0340,<br><i>wR</i> <sub>2</sub> = 0.0673                  | <i>R</i> <sub>1</sub> = 0.0187,<br><i>wR</i> <sub>2</sub> = 0.0404            | <i>R</i> <sub>1</sub> = 0.0278,<br><i>wR</i> <sub>2</sub> = 0.0536           | <i>R</i> <sub>1</sub> = 0.1195,<br><i>wR</i> <sub>2</sub> = 0.2062                                |
| Largest diff. peak/hole / e Å <sup>-3</sup>                   | 1.386/−1.591                                                                        | 0.665/−0.646                                                                  | 0.874/−1.261                                                                 | 2.553/−2.041                                                                                      |

**Table S2.** SHAPE analysis of the Dy(III) ion for complex **1**.

| Label      | Shape                                                          | Symmetry         | <b>1</b> (Distortion) |
|------------|----------------------------------------------------------------|------------------|-----------------------|
|            |                                                                |                  | DyI                   |
| DP-10      | Decagon                                                        | D <sub>10h</sub> | 36.905                |
| EPY-10     | Enneagonal pyramid                                             | C <sub>9v</sub>  | 24.341                |
| OBPY-10    | Octagonal bipyramid                                            | D <sub>8h</sub>  | 16.713                |
| PPR-10     | Pentagonal prism                                               | D <sub>5h</sub>  | 9.170                 |
| PAPR-10    | Pentagonal antiprism                                           | D <sub>5d</sub>  | 11.286                |
| JBCCU-10   | Bicapped cube (Elongated square bipyramid J15)                 | D <sub>4h</sub>  | 11.519                |
| JBCSAPR-10 | Bicapped square antiprism (Gyroelongated square bipyramid J17) | D <sub>4d</sub>  | 6.404                 |
| JMBIC-10   | Metabidiminished icosahedron (J62)                             | C <sub>2v</sub>  | 8.158                 |
| JATDI-10   | Augmented tridiminished icosahedron (J64)                      | C <sub>3v</sub>  | 17.535                |
| JSPC-10    | Sphenocorona (J87)                                             | C <sub>2v</sub>  | <b>3.022</b>          |
| SDD-10     | Staggered dodecahedron                                         | D <sub>2</sub>   | 5.108                 |
| TD-10      | Tetradecahedron                                                | C <sub>2v</sub>  | 4.965                 |
| HD-10      | Hexadecahedron                                                 | D <sub>4h</sub>  | 7.884                 |

**Table S3.** SHAPE analysis of the Dy(III) ion for complexes **2, 3 and 4**.

| Label    | Shape                              | Symmetry        | <b>2</b> (Distortion) | <b>3</b> (Distortion) | <b>4</b> (Distortion) |               |
|----------|------------------------------------|-----------------|-----------------------|-----------------------|-----------------------|---------------|
|          |                                    |                 | DyI                   | DyI                   | DyA                   | DyB           |
| EP-9     | Enneagon                           | D <sub>9h</sub> | 33.888                | 34.886                | 33.516                | <b>34.110</b> |
| OPY-9    | Octagonal pyramid                  | C <sub>8v</sub> | 24.778                | 25.224                | 22.066                | 25.280        |
| HBPY-9   | Heptagonal bipyramid               | D <sub>7h</sub> | 16.858                | 16.348                | 15.707                | 16.133        |
| JTC-9    | Johnson triangular cupola J3       | C <sub>3v</sub> | 14.051                | 15.711                | 15.033                | 15.573        |
| JCCU-9   | Capped cube J8                     | C <sub>4v</sub> | 8.556                 | 9.107                 | 7.438                 | 8.646         |
| CCU-9    | Spherical-relaxed capped cube      | C <sub>4v</sub> | 6.867                 | 7.387                 | 5.957                 | 6.834         |
| JCSAPR-9 | Capped square antiprism J10        | C <sub>4v</sub> | 4.354                 | 4.432                 | 3.700                 | 4.761         |
| CSAPR-9  | Spherical capped square antiprism  | C <sub>4v</sub> | 3.863                 | 3.929                 | <b>2.640</b>          | 4.312         |
| JTCTPR-9 | Tricapped trigonal prism J51       | D <sub>3h</sub> | 4.216                 | 5.419                 | 4.234                 | 5.438         |
| TCTPR-9  | Spherical tricapped trigonal prism | D <sub>3h</sub> | 3.309                 | 4.398                 | 3.476                 | 4.623         |
| JTDIC-9  | Tridiminished icosahedron J63      | C <sub>3v</sub> | 10.827                | 11.404                | 9.506                 | 10.974        |
| HH-9     | Hula-hoop                          | C <sub>2v</sub> | 6.553                 | 5.839                 | 7.376                 | 5.315         |
| MFF-9    | Muffin                             | C <sub>s</sub>  | <b>2.947</b>          | <b>2.990</b>          | <b>3.105</b>          | <b>3.263</b>  |

**Table S4.** Relaxation fitting parameters from the least-square fitting of the Cole-Cole plots of **1** by the single-component generalized Debye model at zero and 1000 Oe dc fields.

| $T$ (K)             | $\chi_s$ (emu/mol) | $\Delta\chi$ (emu/mol) | $\tau$ (s) | $\alpha$ |
|---------------------|--------------------|------------------------|------------|----------|
| At zero dc field    |                    |                        |            |          |
| 1.9                 | 2.30697            | 3.04097                | 6.02062E-5 | 0.05937  |
| 2.09                | 2.11335            | 2.70905                | 6.02577E-5 | 0.05208  |
| 2.29                | 2.01893            | 2.42551                | 6.28703E-5 | 0.04155  |
| 2.48                | 1.78118            | 2.30819                | 5.92629E-5 | 0.05257  |
| 2.67                | 1.71971            | 2.06475                | 6.19188E-5 | 0.03877  |
| 2.87                | 1.603              | 1.92383                | 6.13093E-5 | 0.03741  |
| 3.06                | 1.50696            | 1.79674                | 6.12411E-5 | 0.04246  |
| 3.25                | 1.34893            | 1.76024                | 5.73886E-5 | 0.04736  |
| 3.45                | 1.31004            | 1.61969                | 5.89545E-5 | 0.04163  |
| 3.64                | 1.21221            | 1.55859                | 5.71967E-5 | 0.04351  |
| 3.83                | 1.13565            | 1.49432                | 5.60818E-5 | 0.04762  |
| 4.03                | 1.13565            | 1.49432                | 5.60818E-5 | 0.04762  |
| 4.22                | 1.07129            | 1.3183                 | 5.75306E-5 | 0.03782  |
| 4.42                | 0.98964            | 1.29668                | 5.47705E-5 | 0.04772  |
| 4.61                | 0.99401            | 1.19614                | 5.73041E-5 | 0.03291  |
| 4.8                 | 0.98482            | 1.11982                | 5.78966E-5 | 0.03476  |
| 5                   | 0.89619            | 1.12595                | 5.47014E-5 | 0.0359   |
| 5.5                 | 0.81253            | 1.0267                 | 5.16622E-5 | 0.04078  |
| 6                   | 0.67194            | 1.01341                | 4.44275E-5 | 0.03785  |
| 6.5                 | 0.70981            | 0.85446                | 4.56941E-5 | 0.03169  |
| At 1000 Oe dc field |                    |                        |            |          |
| 1.9                 | 0.15646            | 6.83504                | 0.53286    | 0.39895  |
| 2.09                | 0.14555            | 5.90392                | 0.36651    | 0.39309  |
| 2.29                | 0.14145            | 5.22739                | 0.25381    | 0.38087  |
| 2.48                | 0.13538            | 4.67736                | 0.17567    | 0.36954  |
| 2.67                | 0.13498            | 4.16811                | 0.11828    | 0.34721  |
| 2.87                | 0.13602            | 3.74413                | 0.08066    | 0.3238   |
| 3.06                | 0.13695            | 3.39498                | 0.05627    | 0.29923  |
| 3.25                | 0.13808            | 3.11331                | 0.04046    | 0.27412  |
| 3.45                | 0.1359             | 2.88849                | 0.02963    | 0.25563  |
| 3.64                | 0.13798            | 2.68855                | 0.0218     | 0.23554  |
| 3.83                | 0.13665            | 2.52344                | 0.01629    | 0.21527  |
| 4.03                | 0.13339            | 2.38952                | 0.0123     | 0.20222  |
| 4.22                | 0.13248            | 2.26505                | 0.00935    | 0.18459  |
| 4.42                | 0.12923            | 2.16774                | 0.00726    | 0.17339  |

|      |         |         |            |         |
|------|---------|---------|------------|---------|
| 4.61 | 0.13179 | 2.06266 | 0.00562    | 0.15762 |
| 4.8  | 0.12925 | 1.97693 | 0.00439    | 0.14773 |
| 5    | 0.12659 | 1.89416 | 0.00342    | 0.14008 |
| 5.5  | 0.1207  | 1.7171  | 0.00187    | 0.12194 |
| 6    | 0.11703 | 1.57108 | 0.00106    | 0.10543 |
| 6.5  | 0.11538 | 1.44692 | 6.31104E-4 | 0.09046 |
| 7    | 0.12665 | 1.32866 | 3.92451E-4 | 0.07883 |
| 7.5  | 0.13071 | 1.23129 | 2.47604E-4 | 0.07642 |
| 8    | 0.13135 | 1.1457  | 1.60013E-4 | 0.07223 |
| 8.5  | 0.13709 | 1.0654  | 1.05583E-4 | 0.06775 |
| 9    | 0.20331 | 0.92987 | 7.82507E-5 | 0.04267 |
| 9.5  | 0.24896 | 0.82633 | 5.85144E-5 | 0.02713 |
| 10   | 0.27448 | 0.74842 | 4.1608E-5  | 0.02412 |

**Table S5.** Relaxation fitting parameters from the least-square fitting of the Cole-Cole plots of **2** by the single-component generalized Debye model at zero and 1000 Oe dc fields.

| $T$ (K)          | $\chi_s$ (emu/mol) | $\Delta\chi$ (emu/mol) | $\tau$ (s) | $\alpha$ |
|------------------|--------------------|------------------------|------------|----------|
| At zero dc field |                    |                        |            |          |
| 1.9              | 1.87668            | 3.26283                | 1.04119E-4 | 0.03877  |
| 2.09             | 1.54462            | 3.11523                | 9.49454E-5 | 0.0492   |
| 2.29             | 1.358              | 2.9421                 | 9.07515E-5 | 0.05263  |
| 2.48             | 1.16613            | 2.78527                | 8.5878E-5  | 0.05331  |
| 2.67             | 1.11951            | 2.53459                | 8.73524E-5 | 0.05117  |
| 2.87             | 0.92985            | 2.53763                | 7.9977E-5  | 0.05992  |
| 3.06             | 0.85826            | 2.39586                | 7.87465E-5 | 0.06008  |
| 3.25             | 0.78312            | 2.28515                | 7.67839E-5 | 0.05997  |
| 3.45             | 0.73065            | 2.16865                | 7.53212E-5 | 0.05914  |
| 3.64             | 0.68459            | 2.0598                 | 7.36752E-5 | 0.05745  |
| 4.03             | 0.68165            | 1.80012                | 7.39844E-5 | 0.04751  |
| 4.22             | 0.66601            | 1.70568                | 7.29151E-5 | 0.04342  |
| 4.42             | 0.60524            | 1.66773                | 6.85771E-5 | 0.04717  |
| 4.61             | 0.58735            | 1.59301                | 6.6307E-5  | 0.04256  |
| 4.8              | 0.54817            | 1.54664                | 6.27471E-5 | 0.04013  |
| 5                | 0.51205            | 1.50187                | 5.88085E-5 | 0.03846  |
| 5.5              | 0.40164            | 1.4325                 | 4.75439E-5 | 0.03174  |
| 6                | 0.48881            | 1.20989                | 4.43168E-5 | 0.02466  |
| 6.5              | 0.38361            | 1.19177                | 3.22233E-5 | 0.03201  |
| 7                | 0.34127            | 1.12668                | 2.41133E-5 | 0.03288  |

|                     |         |         |            |         |
|---------------------|---------|---------|------------|---------|
| 7.5                 | 0.34644 | 1.02832 | 1.80517E-5 | 0.03882 |
| 8                   | 0.35881 | 0.93323 | 1.32779E-5 | 0.04733 |
| 8.5                 | 0.06756 | 1.15186 | 6.56051E-6 | 0.0681  |
| 9                   | 0.60437 | 0.55052 | 9.25159E-6 | 0.07755 |
| 9.5                 | 0.4154  | 0.68054 | 4.29508E-6 | 0.10082 |
|                     |         |         |            |         |
| At 1000 Oe dc field |         |         |            |         |
|                     |         |         |            |         |
| 1.9                 |         |         |            |         |
| 2.09                | 0.26589 | 8.15878 | 1.0065     | 0.28934 |
| 2.29                | 0.26171 | 4.64832 | 0.23192    | 0.19795 |
| 2.48                | 0.25302 | 3.73233 | 0.10374    | 0.14689 |
| 2.67                | 0.24226 | 3.37631 | 0.05952    | 0.12323 |
| 2.87                | 0.23585 | 3.09192 | 0.03526    | 0.10079 |
| 3.06                | 0.22403 | 2.91349 | 0.02302    | 0.09897 |
| 3.25                | 0.21564 | 2.74421 | 0.01521    | 0.08845 |
| 3.45                | 0.20753 | 2.59271 | 0.01031    | 0.07825 |
| 3.64                | 0.20007 | 2.45695 | 0.00717    | 0.06899 |
| 3.83                | 0.19113 | 2.34108 | 0.0051     | 0.06276 |
| 4.03                | 0.18392 | 2.23292 | 0.00369    | 0.05646 |
| 4.22                | 0.177   | 2.1379  | 0.00272    | 0.05234 |
| 4.42                | 0.16847 | 2.06092 | 0.00204    | 0.05204 |
| 4.61                | 0.16255 | 1.9792  | 0.00154    | 0.04874 |
| 4.8                 | 0.15585 | 1.90768 | 0.00117    | 0.04787 |
| 5                   | 0.14925 | 1.83834 | 8.88631E-4 | 0.04694 |
| 5.5                 | 0.13476 | 1.69584 | 4.55044E-4 | 0.04486 |
| 6                   | 0.11684 | 1.56966 | 2.40953E-4 | 0.04725 |
| 6.5                 | 0.09217 | 1.47428 | 1.3259E-4  | 0.05236 |
| 7                   | 0.0724  | 1.38862 | 7.45851E-5 | 0.0549  |
| 7.5                 | 0.02524 | 1.34332 | 4.11133E-5 | 0.06431 |
| 8                   | 0.04898 | 1.23783 | 2.45695E-5 | 0.06493 |
|                     |         |         |            |         |



**Table S6.** Relaxation fitting parameters from the least-square fitting of the Cole-Cole plots of **4** by the single-component generalized Debye model at zero dc field.

| $T$ (K) | $\chi_s$ (emu/mol) | $\Delta\chi$ (emu/mol) | $\tau$ (s) | $\alpha$ |
|---------|--------------------|------------------------|------------|----------|
| 1.9     | 1.73238            | 4.92454                | 1.41148E-4 | 0.11624  |
| 2.1     | 1.63916            | 4.32748                | 1.40498E-4 | 0.09385  |
| 2.3     | 1.49929            | 4.01055                | 1.38204E-4 | 0.09602  |
| 2.5     | 1.37036            | 3.70237                | 1.35747E-4 | 0.09627  |
| 2.7     | 1.26303            | 3.44233                | 1.3367E-4  | 0.09623  |
| 2.87    | 1.17797            | 3.21006                | 1.32253E-4 | 0.09499  |
| 3.06    | 1.09237            | 3.01979                | 1.2992E-4  | 0.09636  |
| 3.25    | 1.02511            | 2.84576                | 1.28073E-4 | 0.09598  |
| 3.45    | 0.96401            | 2.68879                | 1.26297E-4 | 0.09547  |
| 3.64    | 0.90369            | 2.55008                | 1.24209E-4 | 0.09467  |
| 3.83    | 0.8718             | 2.40367                | 1.2394E-4  | 0.09208  |
| 4.03    | 0.86629            | 2.24657                | 1.25121E-4 | 0.08469  |
| 4.22    | 0.83429            | 2.13524                | 1.23642E-4 | 0.08119  |
| 4.42    | 0.78709            | 2.05604                | 1.20507E-4 | 0.08341  |
| 4.61    | 0.74904            | 1.97559                | 1.17242E-4 | 0.08223  |
| 4.8     | 0.72585            | 1.88918                | 1.15157E-4 | 0.07898  |
| 5       | 0.68836            | 1.82258                | 1.11383E-4 | 0.07855  |
| 5.5     | 0.62528            | 1.65652                | 1.02828E-4 | 0.07203  |
| 6       | 0.56549            | 1.52566                | 9.26699E-5 | 0.06696  |
| 6.5     | 0.51936            | 1.41483                | 8.29143E-5 | 0.06155  |
| 7       | 0.55946            | 1.25185                | 8.14543E-5 | 0.04719  |
| 7.5     | 0.51612            | 1.1752                 | 7.06286E-5 | 0.04661  |
| 8       | 0.50993            | 1.0758                 | 6.33766E-5 | 0.04016  |
| 8.5     | 0.50503            | 0.98831                | 5.61362E-5 | 0.03715  |
| 9       | 0.48805            | 0.92247                | 4.83038E-5 | 0.03604  |
| 9.5     | 0.50778            | 0.82864                | 4.33621E-5 | 0.0304   |
| 10      | 0.44471            | 0.825                  | 3.3811E-5  | 0.03911  |
|         |                    |                        |            |          |

**Table S7.** Relaxation fitting parameters from the least-square fitting of the Cole-Cole plots of **4** by the double-component generalized Debye model at 1000 Oe dc field.

| $T$<br>(K) | $\chi_s$<br>(emu/mol) | $\Delta\chi_1$<br>(emu/mol) | $\tau_1$ (s) | $\alpha_1$ | $\Delta\chi_2$<br>(emu/mol) | $\tau_2$ (s) | $\alpha_2$ |
|------------|-----------------------|-----------------------------|--------------|------------|-----------------------------|--------------|------------|
| 2          | 0.15882               | 0.85965                     | 0.75917      | 0*         | 5.3854                      | 0.28936      | 0.3937     |
| 2.2        | 0.14796               | 0.86504                     | 0.76553      | 0*         | 4.82582                     | 0.19614      | 0.37908    |
| 2.4        | 0.13095               | 0.80571                     | 0.64823      | 0*         | 4.35007                     | 0.12615      | 0.37099    |
| 2.6        | 0.12269               | 0.86632                     | 0.57717      | 0*         | 3.83818                     | 0.07618      | 0.35058    |
| 2.8        | 0.11397               | 0.87563                     | 0.50063      | 0.00982    | 3.49207                     | 0.04999      | 0.33483    |
| 3.0        | 0.10609               | 1.00595                     | 0.38273      | 0.04404    | 3.07018                     | 0.03007      | 0.31649    |
| 3.2        | 0.10141               | 1.08007                     | 0.2919       | 0.07405    | 2.75863                     | 0.01935      | 0.29857    |
| 3.4        | 0.09954               | 1.17595                     | 0.21452      | 0.10907    | 2.45615                     | 0.01245      | 0.27834    |
| 3.6        | 0.09315               | 1.1213                      | 0.15604      | 0.10168    | 2.28548                     | 0.0088       | 0.27065    |
| 3.8        | 0.08734               | 1.09566                     | 0.11704      | 0.10207    | 2.13192                     | 0.00628      | 0.26003    |
| 4.0        | 0.07991               | 1.01846                     | 0.09078      | 0.09303    | 2.04916                     | 0.00477      | 0.25846    |
| 4.2        | 0.07482               | 1.02272                     | 0.06675      | 0.09927    | 1.90527                     | 0.0035       | 0.25257    |
| 4.4        | 0.06349               | 0.92802                     | 0.05317      | 0.08664    | 1.87641                     | 0.00281      | 0.26027    |
| 4.6        | 0.06268               | 0.95342                     | 0.03921      | 0.10191    | 1.73423                     | 0.00209      | 0.2504     |
| 4.8        | 0.0555                | 0.92509                     | 0.03081      | 0.08966    | 1.65434                     | 0.00162      | 0.24829    |
| 5          | 0.04772               | 0.84216                     | 0.02543      | 0.0692     | 1.63886                     | 0.00135      | 0.25611    |
| 5.5        | 0.02978               | 0.75765                     | 0.01497      | 0.04907    | 1.51576                     | 7.93367E-4   | 0.26566    |
| 6          | -0.00221              | 0.6705                      | 0.00922      | 0.03124    | 1.4513                      | 4.9278E-4    | 0.28881    |
| 6.5        | -0.0172               | 0.64168                     | 0.00574      | 0.0462     | 1.33831                     | 3.05222E-4   | 0.29698    |
| 7          | 0.01111               | 0.61321                     | 0.00378      | 0.03573    | 1.19859                     | 2.05933E-4   | 0.27886    |
| 7.5        | 0.0374                | 0.58511                     | 0.0026       | 0.03386    | 1.08821                     | 1.46739E-4   | 0.27082    |
| 8          | 0.10005               | 0.55627                     | 0.00182      | 0.04615    | 0.95954                     | 1.1822E-4    | 0.25717    |
| 8.5        | 0.16436               | 0.52865                     | 0.00133      | 0.04813    | 0.82841                     | 9.67172E-5   | 0.22268    |

\* The values were fixed to avoid overparameterization

**Table S8.** Relaxation fitting parameters from the least-square fitting of the Cole-Cole plots of **3** by the single-component generalized Debye model at 600 Oe dc field.

| $T$ (K)            | $\chi_s$ (emu/mol) | $\Delta\chi$ (emu/mol) | $\tau$ (s) | $\alpha$ |
|--------------------|--------------------|------------------------|------------|----------|
| At 600 Oe dc field |                    |                        |            |          |
| 2                  | 1.60544            | 4.08057                | 2.80178E-4 | 0.21775  |
| 2.18               | 1.3853             | 3.81145                | 1.33514E-4 | 0.23704  |
| 2.37               | 1.22632            | 3.68233                | 7.38287E-5 | 0.23294  |
| 2.56               | 1.16392            | 3.48997                | 4.75645E-5 | 0.22106  |
| 2.75               | 1.27223            | 3.14885                | 3.59682E-5 | 0.20336  |
| 2.93               | 1.34165            | 2.85851                | 2.91363E-5 | 0.17514  |
| 3.12               | 1.12217            | 2.88231                | 2.0777E-5  | 0.15874  |
| 3.31               | 1.85551            | 1.96847                | 2.51867E-5 | 0.11767  |
| 3.49               | 1.34429            | 2.31208                | 1.32998E-5 | 0.13366  |

**Table S9.** Relaxation fitting parameters from the least-square fitting of the Cole-Cole plots of **3** by the single-component generalized Debye model at 2000 Oe dc field.

| $T$ (K) | $\chi_s$ (emu/mol) | $\Delta\chi_1$ (emu/mol) | $\tau_1$ (s) | $\alpha_1$ | $\Delta\chi_2$ (emu/mol) | $\tau_2$ (s) | $\alpha_2$ | $\Delta\chi_3$ (emu/mol) | $\tau_3$ (s) | $\alpha_3$ |
|---------|--------------------|--------------------------|--------------|------------|--------------------------|--------------|------------|--------------------------|--------------|------------|
| 2       | 0.05*              | 1.68788                  | 1.6171E-4    | 0.33373    | 1.59521                  | 0.01499      | 0.34588    | 1.61549                  | 0.41128      | 0.05209    |
| 2.2     | 0.05*              | 1.75646                  | 1.1900E-4    | 0.33884    | 1.55478                  | 0.01836      | 0.37595    | 1.45713                  | 0.38138      | 0.01568    |
| 2.4     | 0.05*              | 2.04636                  | 1.0149E-4    | 0.36345    | 1.05726                  | 0.01678      | 0.29654    | 1.38027                  | 0.32196      | 0.05367    |
| 2.6     | 0.05584            | 2.17175                  | 8.1836E-5    | 0.33972    | 1.00073                  | 0.01971      | 0.31571    | 1.04371                  | 0.30008      | 0.00833    |
| 2.8     | 0.11104            | 2.25702                  | 7.0186E-5    | 0.3087     | 0.73033                  | 0.01618      | 0.27242    | 0.94807                  | 0.26982      | 0.04565    |
| 3       | 0.26446            | 2.18544                  | 6.3284E-5    | 0.25831    | 0.61273                  | 0.01499      | 0.27877    | 0.77649                  | 0.25797      | 0.05019    |
| 3.2     | 0.13822            | 2.38051                  | 4.3297E-5    | 0.24321    | 0.5317                   | 0.01612      | 0.30438    | 0.59418                  | 0.25598      | 0.02763    |
| 3.4     | 0.05*              | 2.50095                  | 2.9456E-5    | 0.21995    | 0.43899                  | 0.01452      | 0.33159    | 0.49145                  | 0.25089      | 0.02454    |
| 3.6     | 0.05*              | 2.47533                  | 2.0296E-5    | 0.17306    | 0.42696                  | 0.0108       | 0.45348    | 0.3875                   | 0.24467      | 0.00697    |
| 3.8     | 0.05*              | 2.49337                  | 1.3393E-5    | 0.18225    | 0.32158                  | 0.01068      | 0.45931    | 0.32542                  | 0.24333      | 0*         |
| 4       | 0.05*              | 2.46844                  | 8.1228E-6    | 0.20491    | 0.28841                  | 0.00994      | 0.5318     | 0.24789                  | 0.24983      | 0*         |
| 4.2     | 0.05*              | 2.00248                  | 5.4876E-6    | 0.2682     | 0.22495                  | 0.00884      | 0.55535    | 0.20021                  | 0.25655      | 0*         |
| 4.4     | 0.05*              | 2.49255                  | 9.6547E-7    | 0.48193    | 0.09677                  | 0.02614      | 0.3956     | 0.16478                  | 0.28522      | 0*         |
| 4.6     | 0.05*              | 2.44774                  | 4.2254E-7    | 0.53342    | 0.06624                  | 0.03577      | 0.38084    | 0.13123                  | 0.30348      | 0*         |
| 4.8     | 0.05*              | 2.40888                  | 1.1955E-7    | 0.61033    | 0.02829                  | 0.05052      | 0.15898    | 0.10917                  | 0.32759      | 0*         |
| 5       | 0.05*              | 2.33448                  | 1.3388E-7    | 0.56917    | 0.03311                  | 0.05749      | 0.32429    | 0.08664                  | 0.33935      | 0*         |

\* The values were fixed to avoid overparameterization

**Table S10.** The splitting of  ${}^6\text{H}15/2$  the lowest multiplets for **1** calculated by CASSCF/SINGLE\_ANISO together with  $g$ -values for each Kramers doublets

| $E$ ( $\text{cm}^{-1}$ ) | $g_x$ | $g_y$ | $g_z$  |
|--------------------------|-------|-------|--------|
| 0                        | 0.001 | 0.019 | 18.847 |
| 96                       | 0.110 | 0.136 | 17.752 |
| 143                      | 0.110 | 1.122 | 17.766 |
| 163                      | 0.415 | 1.914 | 13.404 |
| 236                      | 0.244 | 1.023 | 12.899 |
| 280                      | 9.168 | 8.150 | 4.272  |
| 372                      | 0.037 | 0.290 | 16.036 |
| 536                      | 0.032 | 0.113 | 19.085 |

**Table S11.** The splitting of  ${}^6\text{H}15/2$  the lowest multiplets for **2** calculated by CASSCF/SINGLE\_ANISO together with  $g$ -values for each Kramers doublets

| $E$ ( $\text{cm}^{-1}$ ) | $g_x$ | $g_y$ | $g_z$  |
|--------------------------|-------|-------|--------|
| 0                        | 0.008 | 0.023 | 19.070 |
| 96                       | 0.665 | 1.606 | 15.215 |
| 138                      | 0.829 | 1.422 | 14.482 |
| 177                      | 2.594 | 4.641 | 11.331 |
| 208                      | 3.175 | 4.461 | 12.139 |
| 265                      | 1.558 | 2.026 | 13.374 |
| 432                      | 0.061 | 0.075 | 16.148 |
| 611                      | 0.003 | 0.016 | 18.821 |

**Table S12.** The splitting of  ${}^6\text{H}15/2$  the lowest multiplets for **3** calculated by CASSCF/SINGLE\_ANISO together with  $g$ -values for each Kramers doublets

| $E$ ( $\text{cm}^{-1}$ ) | $g_x$ | $g_y$ | $g_z$  |
|--------------------------|-------|-------|--------|
| 0                        | 1.292 | 6.997 | 12.922 |
| 17                       | 2.538 | 4.107 | 9.432  |
| 90                       | 3.812 | 4.486 | 10.731 |
| 132                      | 0.834 | 4.071 | 13.679 |
| 183                      | 1.153 | 3.326 | 12.274 |
| 222                      | 0.942 | 1.308 | 16.554 |
| 390                      | 0.130 | 0.180 | 16.202 |
| 568                      | 0.022 | 0.056 | 18.709 |

**Table S13.** The splitting of  ${}^6\text{H}_{15/2}$  the lowest multiplets for **4-A** calculated by CASSCF/SINGLE\_ANISO together with g-values for each Kramers doublets

| $E$ ( $\text{cm}^{-1}$ ) | $g_x$ | $g_y$ | $g_z$  |
|--------------------------|-------|-------|--------|
| 0                        | 0.080 | 0.197 | 19.066 |
| 86                       | 0.844 | 1.205 | 16.091 |
| 154                      | 2.033 | 3.176 | 13.962 |
| 210                      | 1.908 | 5.126 | 10.863 |
| 284                      | 2.187 | 4.845 | 10.255 |
| 351                      | 1.502 | 1.715 | 15.352 |
| 472                      | 0.180 | 0.276 | 13.737 |
| 645                      | 0.016 | 0.020 | 19.193 |

**Table S14.** The splitting of  ${}^6\text{H}_{15/2}$  the lowest multiplets for **4-B** calculated by CASSCF/SINGLE\_ANISO together with g-values for each Kramers doublets

| $E$ ( $\text{cm}^{-1}$ ) | $g_x$ | $g_y$ | $g_z$  |
|--------------------------|-------|-------|--------|
| 0                        | 0.009 | 0.015 | 19.435 |
| 100                      | 1.003 | 1.842 | 17.746 |
| 134                      | 0.336 | 1.738 | 14.638 |
| 181                      | 3.852 | 5.045 | 11.565 |
| 215                      | 2.146 | 2.532 | 14.997 |
| 261                      | 1.008 | 1.280 | 13.595 |
| 451                      | 0.071 | 0.080 | 16.049 |
| 635                      | 0.013 | 0.044 | 18.667 |

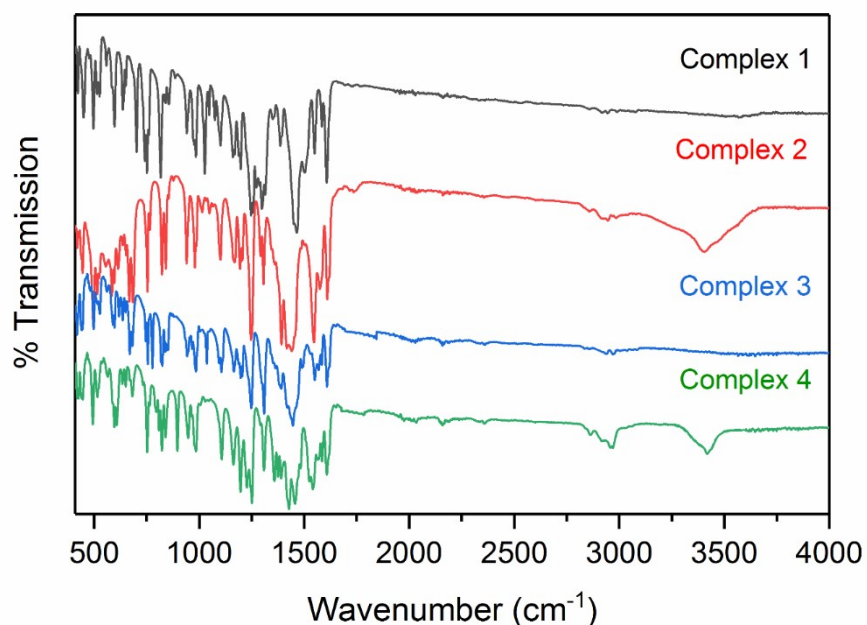

**Fig. S1.** IR spectra of **1-4**.

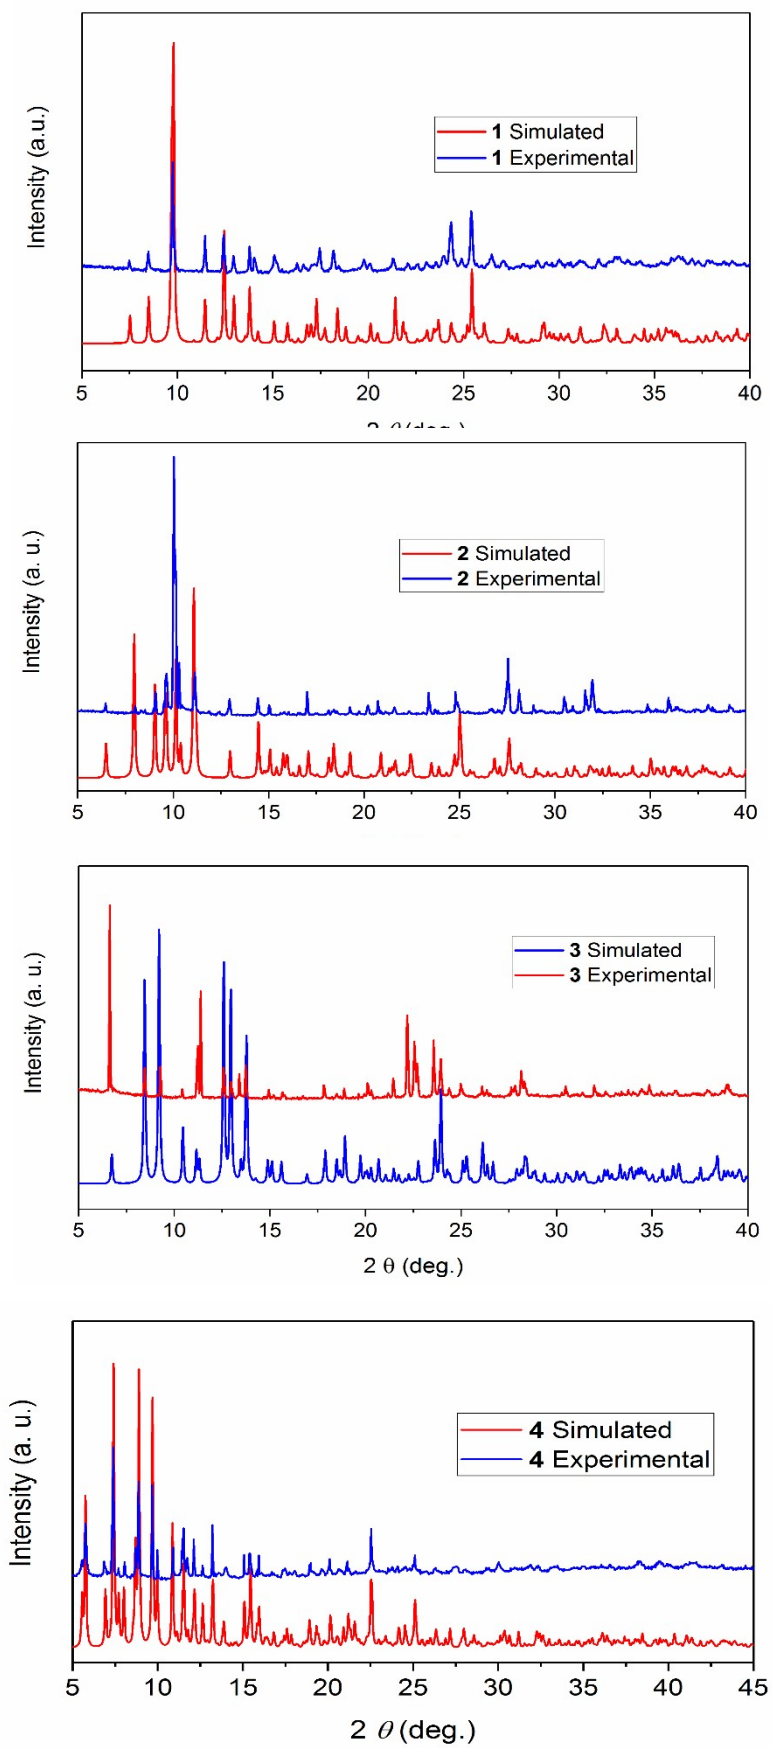

**Fig. S2.** Experimental and simulated PXRD patterns of 1-4

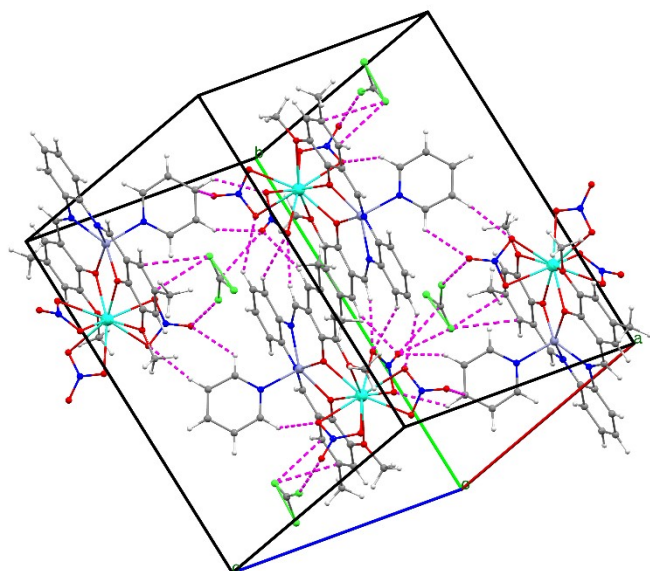

**Fig. S3.** A part of crystal packing for **1**.

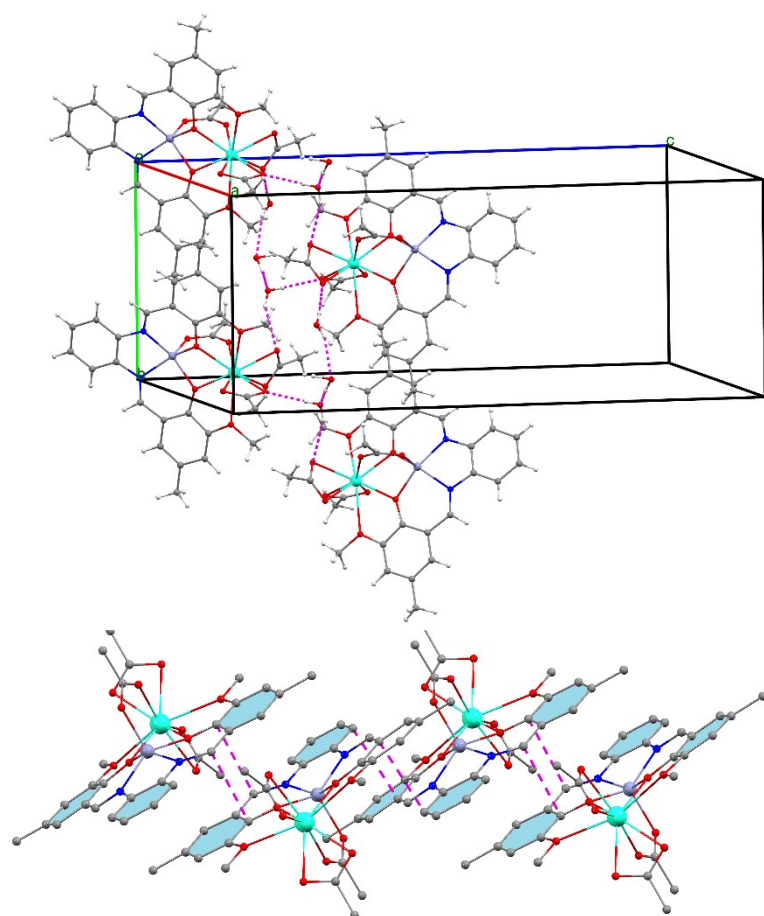

**Fig. S4.** A part of crystal packing showing hydrogen bonding interaction (top) and  $\pi \cdots \pi$  stacking interaction (bottom) for **2**.

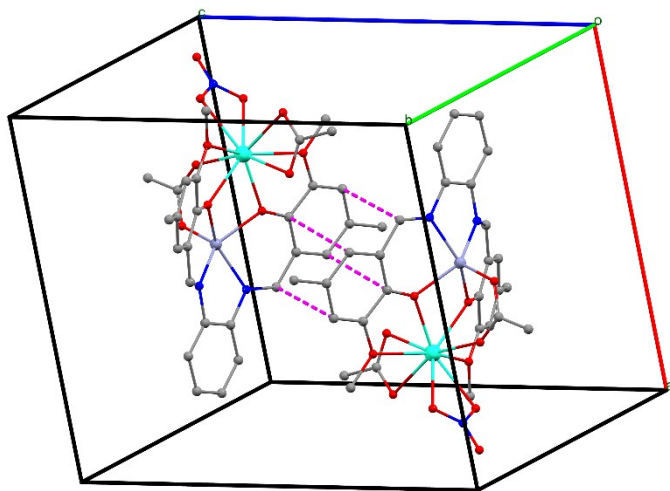

**Fig. S5.** A part of crystal packing for **3**.

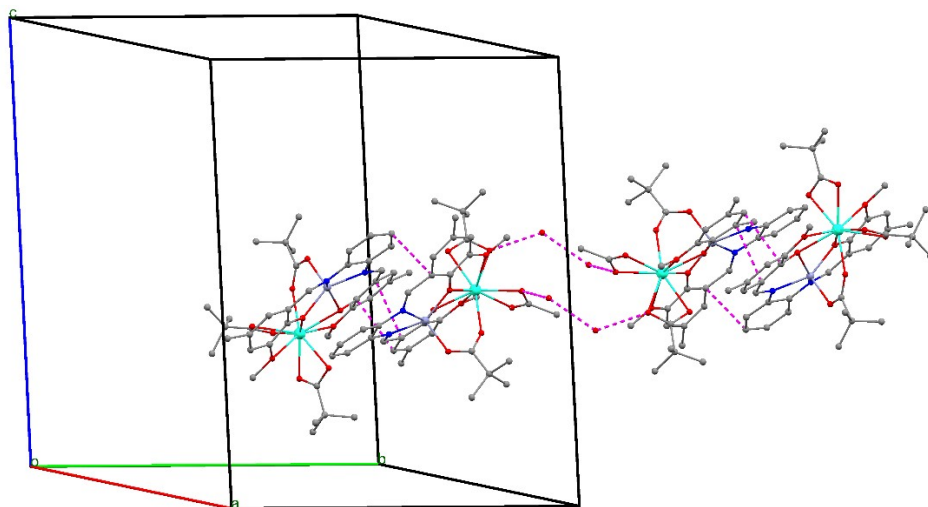

**Fig. S6.** A part of crystal packing for **4**.

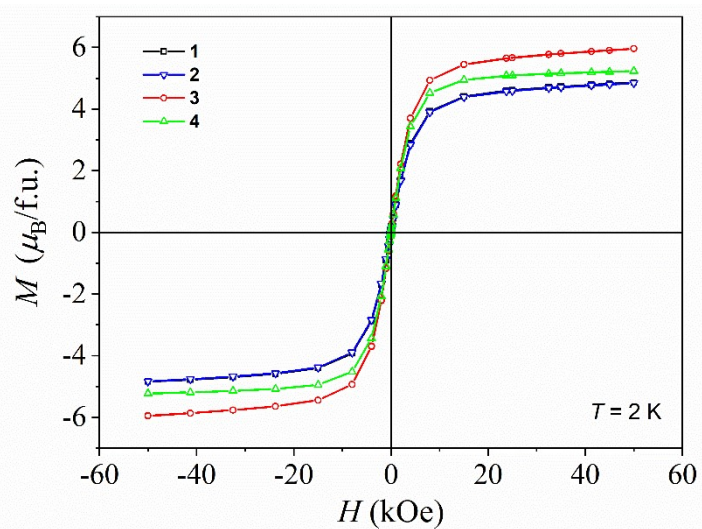

**Fig. S7.** Magnetization plots of **1–4** at 2 K.



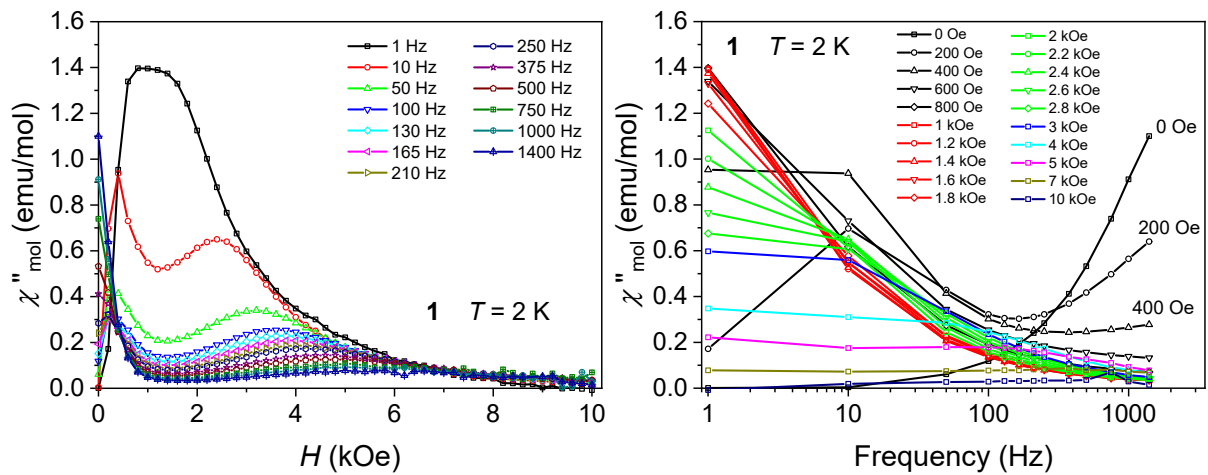

**Fig. S8.** Out-of-phase ac susceptibility as a function of dc magnetic field (left) and frequency (right) for **1** measured at 2 K.

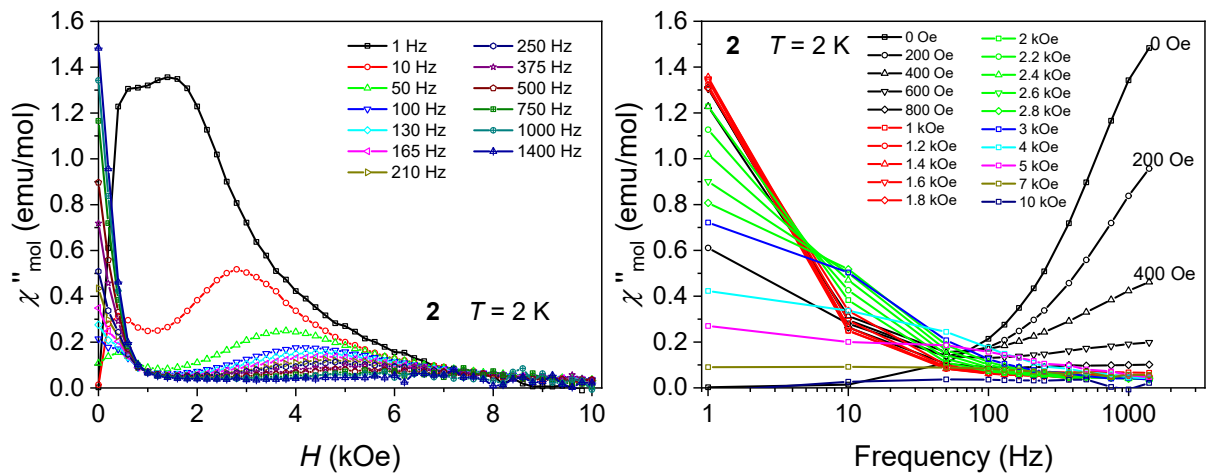

**Fig. S9.** Out-of-phase ac susceptibility as a function of dc magnetic field (left) and frequency (right) for **2** measured at 2 K.

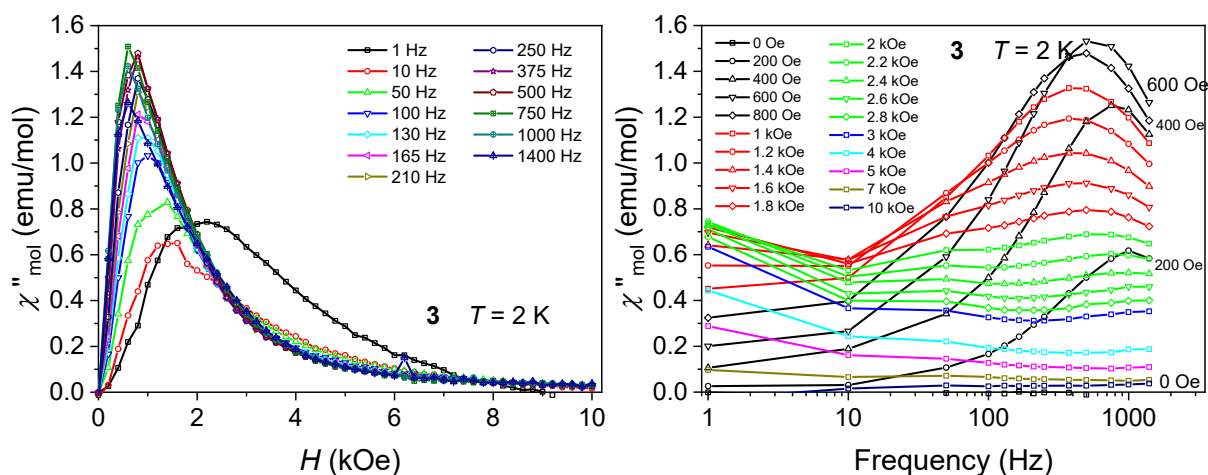

**Fig. S10.** Out-of-phase ac susceptibility as a function of dc magnetic field (left) and frequency (right) for **3** measured at 2 K.

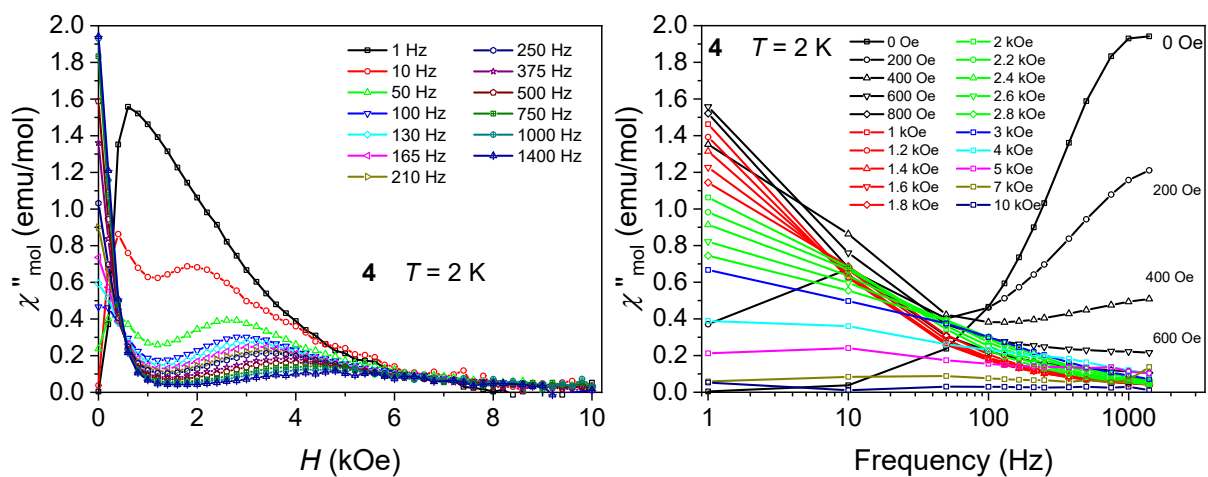

**Fig. S11.** Out-of-phase ac susceptibility as a function of dc magnetic field (left) and frequency (right) for **4** measured at 2 K. The magnetic data are scaled per one Dy<sup>III</sup> ion.

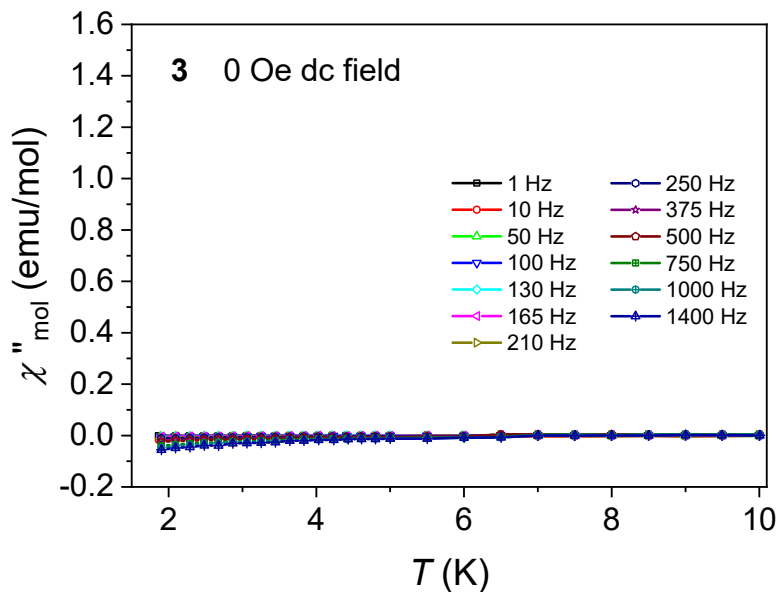

**Fig. S12.** The variable temperature out-of-phase ac susceptibility data of **-3** at zero dc field.

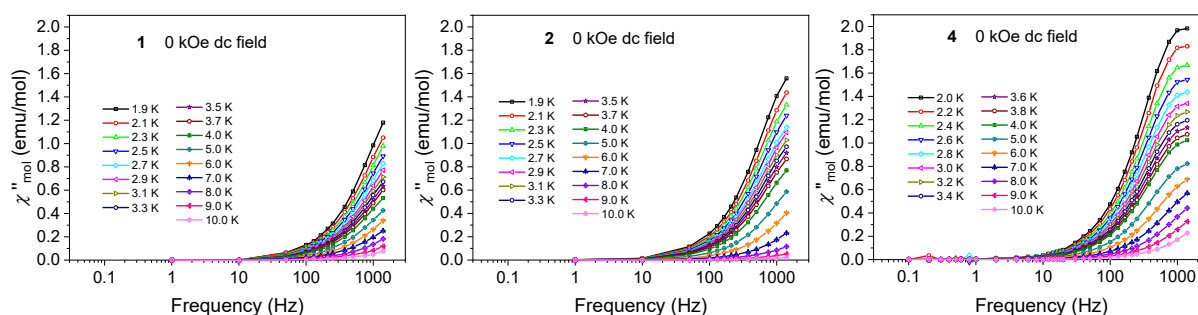

**Fig. S13.** Frequency dependence of the out-of-phase ac susceptibility component of **1**, **2** and **4** measured in the temperature range 1.9–10 K and at zero dc field. The magnetic data are scaled per one Dy<sup>III</sup> ion.

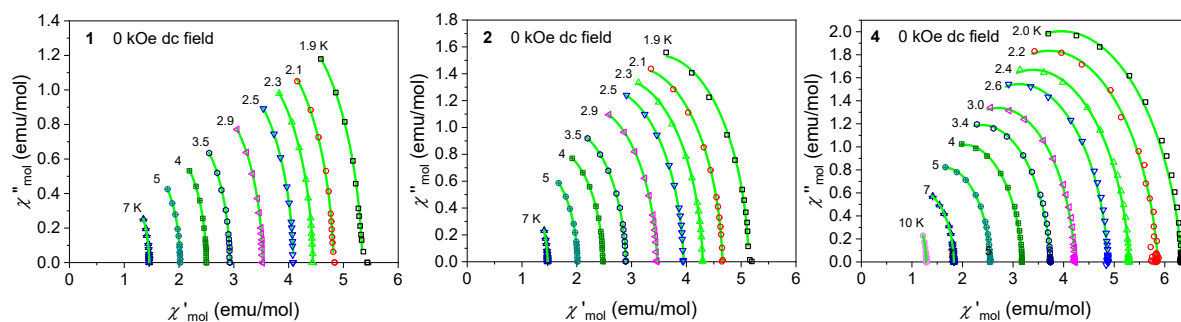

**Fig. S14.** Cole-Cole plots for **1**, **2** and **4** at zero dc field. The solid lines are the best fits to the experiments with the generalized Debye model.

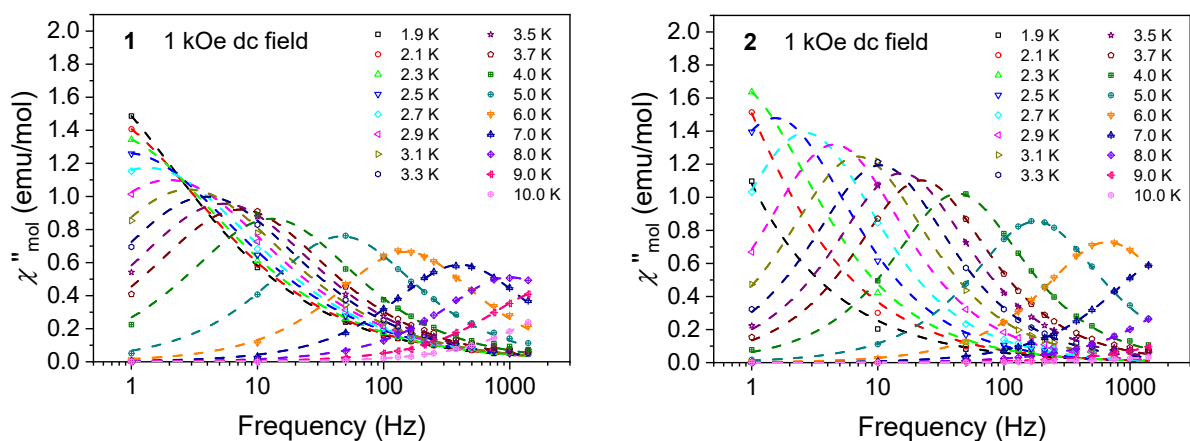

**Fig. S15.** Frequency dependence of the out-of-phase ac susceptibility component of **1** and **2** measured in the temperature range 1.9–10 K and at 1000 Oe dc field. Solid lines represent the best fit by the generalised Debye model.

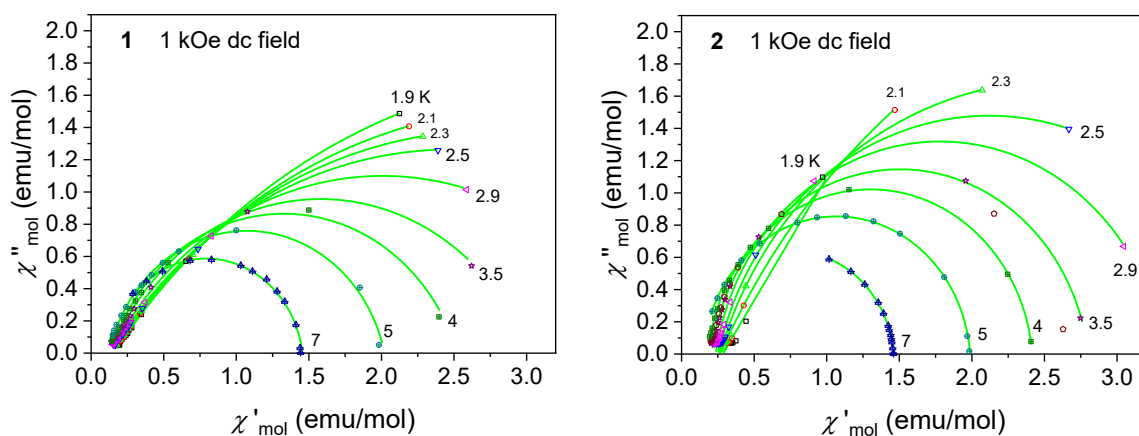

**Fig. S16.** Cole-Cole plots for **1** and **2** at 1000 Oe dc field. The solid lines are the best fits to the experiments with the generalized Debye model.

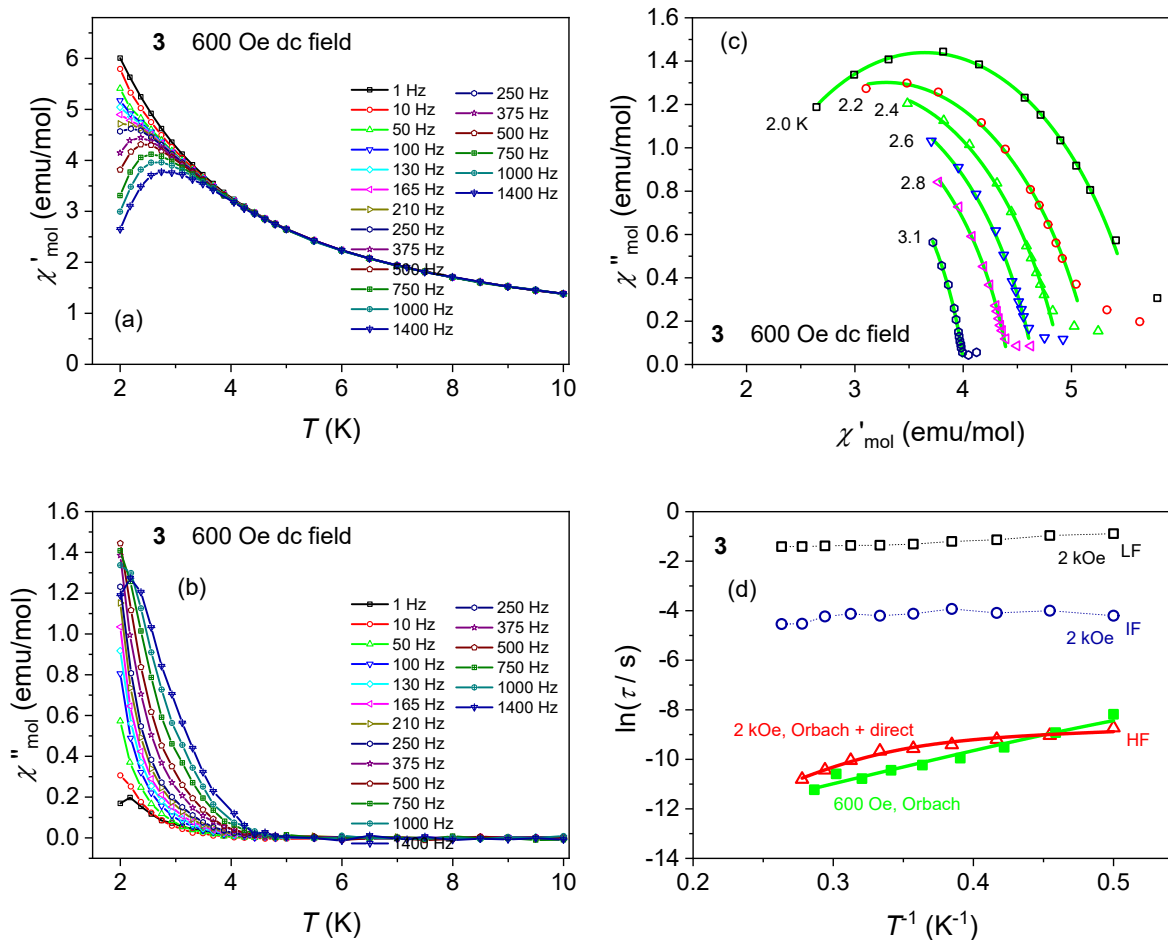

Fig. S17. Temperature dependence of in-phase (a) and out-of-phase (b) ac susceptibilities, Cole-Cole plots fitted by the generalized Debye model (c) at 600 Oe dc field and the logarithmic magnetisation relaxation time versus  $T^{-1}$  plots at 600 and 2000 Oe dc fields for **3**.

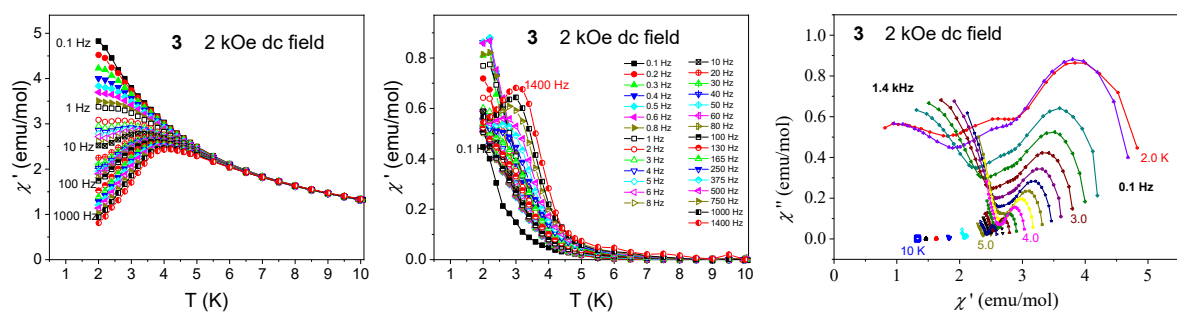

Fig. S18. Temperature dependence of in-phase (a) and out-of-phase (b) ac susceptibilities and Cole-Cole plots fitted by three-set Debye model (c) for **3** at 2000 Oe dc field.

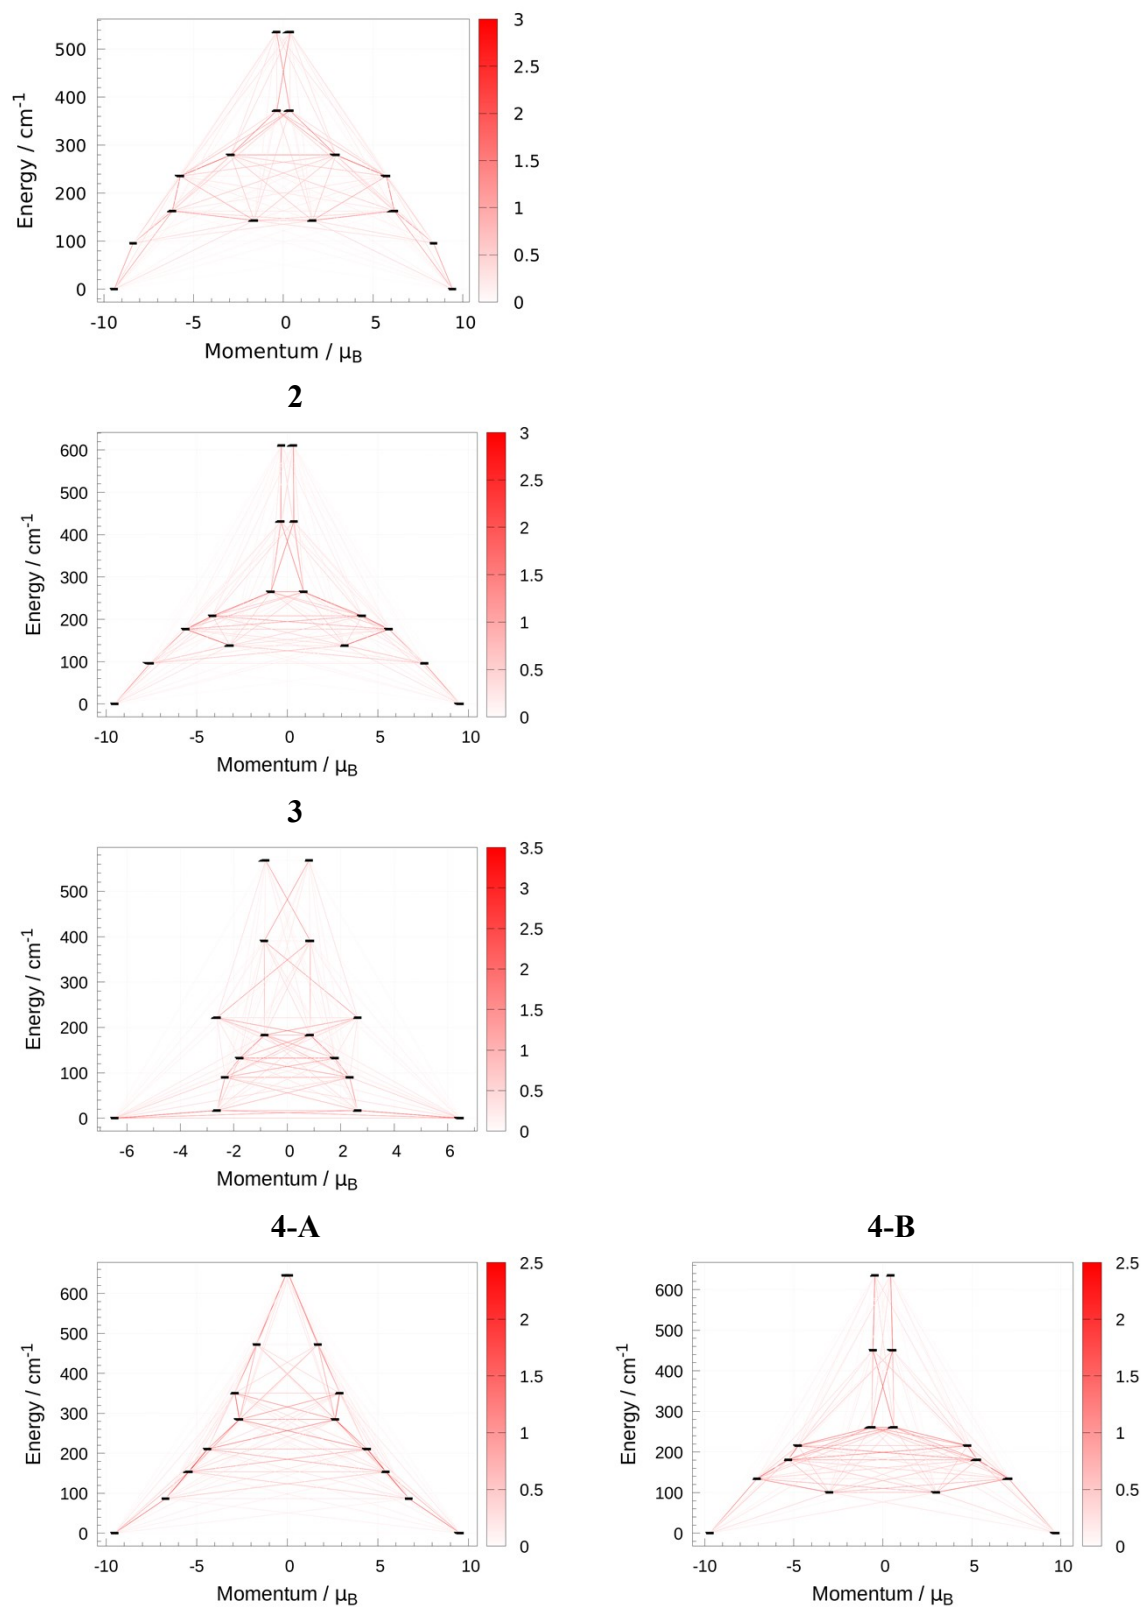

**Fig. S19.** Plots made by SINGLE\_ANISO module based on CASSCF calculations for Dy<sup>III</sup> complexes of 1-4. The red lines represent the transition matrix elements of the magnetic moment connecting two states.

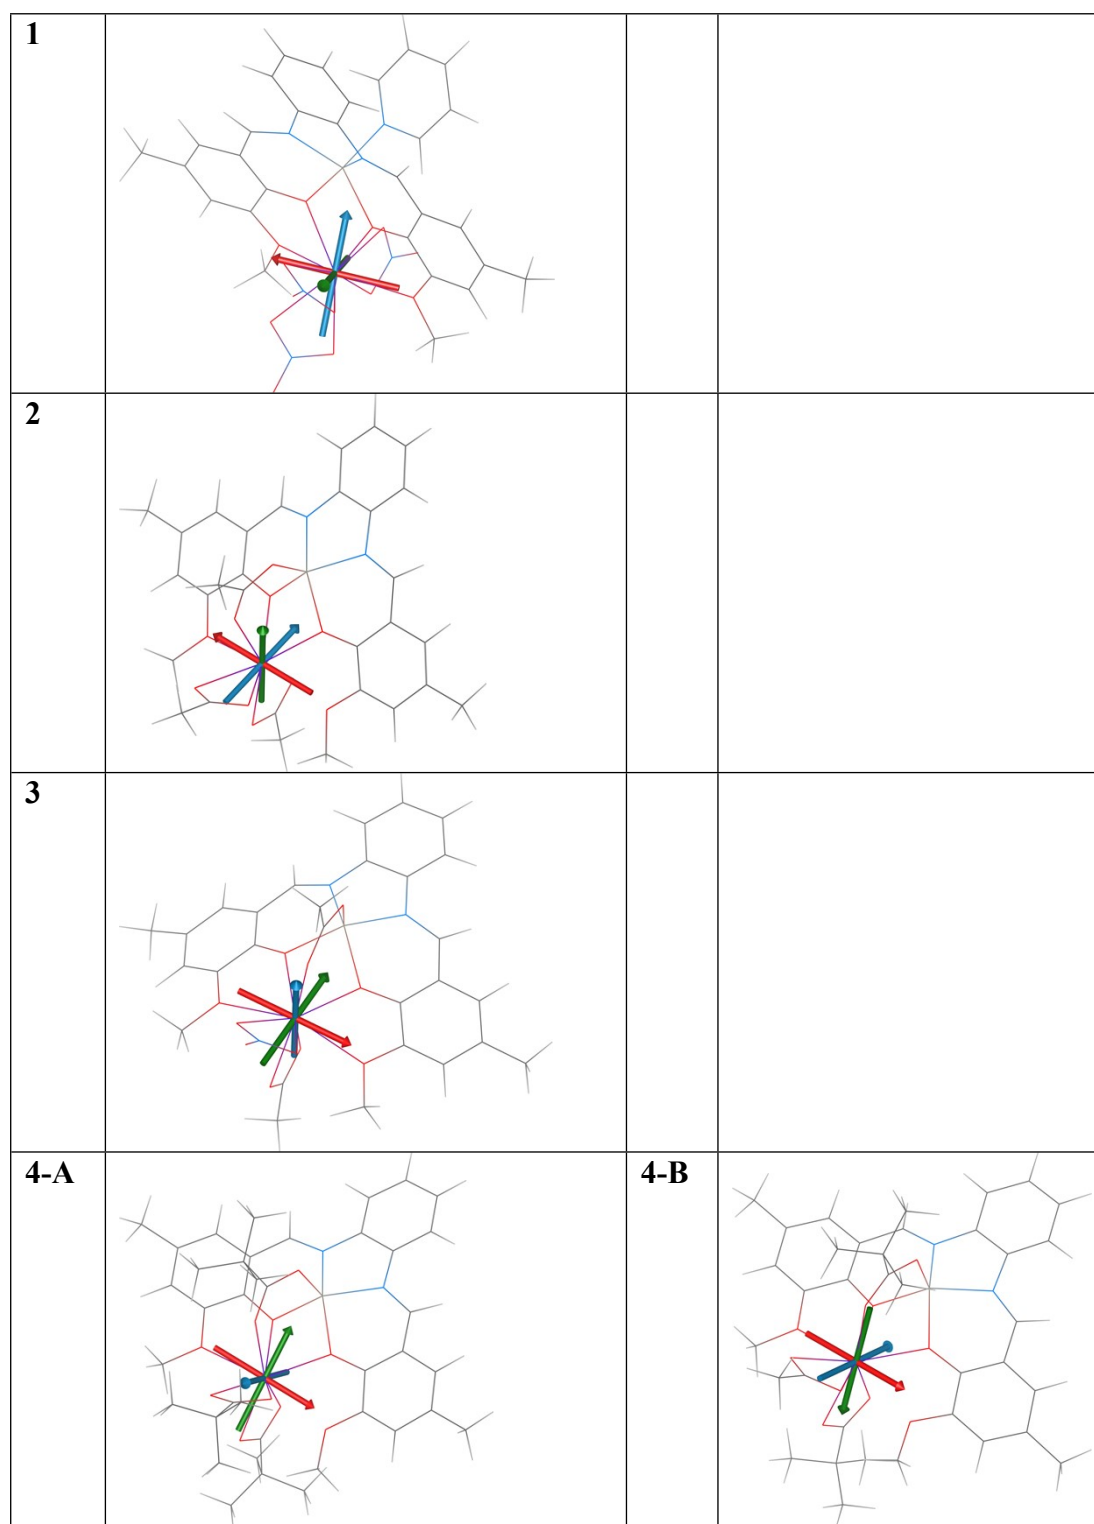

**Fig. S20.** The molecular structures of **1-4** derived from the experimental X-ray geometry used for CASSCF calculations overlaid with of g-tensor of the first Kramers doublet (x/y/z-axis are showed as red/green/blue arrows).
